# Supplementary material
Source: ML conference proceedings conference paper supplement (https://openaccess.thecvf.com/content/CVPR_2019/html/Voigtlaender_FEELVOS_Fast_End-To-End_CVPR_2019_paper.html)
Supplement: Supplementary file 1 [file Voigtlaender_FEELVOS_Fast_End-To-End_CVPR_2019_supplemental.pdf]

Archive with 31 entries (31 files):
- bike-packing.gif
- blackswan.gif
- bmx-trees.gif
- breakdance.gif
- camel.gif
- car-roundabout.gif
- car-shadow.gif
- cows.gif
- dance-twirl.gif
- dog.gif
- dogs-jump.gif
- drift-chicane.gif
- drift-straight.gif
- goat.gif
- gold-fish.gif
- horsejump-high.gif
- india.gif
- judo.gif
- kite-surf.gif
- lab-coat.gif
- libby.gif
- loading.gif
- mbike-trick.gif
- motocross-jump.gif
- paragliding-launch.gif
- parkour.gif
- pigs.gif
- scooter-black.gif
- shooting.gif
- soapbox.gif
- videos.html
