# Supplementary material
Source: ML conference proceedings conference paper supplement (https://openaccess.thecvf.com/content/CVPR_2019/html/Voigtlaender_FEELVOS_Fast_End-To-End_CVPR_2019_paper.html)
Supplement: Supplementary file 1 [file Voigtlaender_FEELVOS_Fast_End-To-End_CVPR_2019_supplemental.pdf › videos.html]

 FEELVOS - Qualitative Results on DAVIS 2017 


# FEELVOS - Qualitative Results on DAVIS 2017
